# Supplementary material for: Kidney trajectory charts to assist general practitioners in the assessment of patients with reduced kidney function: a randomised vignette study
Source: HighWire-hosted journal article supplement (doi:10.1136/bmjebm-2021-111767), 2021-12-21
Supplement: bmjebm-2021-111767supp001_data_supplement.pdf [file bmjebm-2021-111767supp001_data_supplement.pdf]

## Appendix Cases- GPs' attitudes and current practice with respect to the CKD management in General Practice guideline

Phyllis is a 76 year old woman who lives with her husband in suburban Australia. Her only significant medical history is some anxiety, but she is currently well and on no medications. She has no family history of heart disease or diabetes. She is a lifelong non-smoker and not diabetic.

She has an annual check- up with her GP. Her BMI is 27 and BP 140/90 (consistent with previous readings).

Her most recent results show:

| Results                            | (Reference Range)                |
|------------------------------------|----------------------------------|
| eGFR 58 (one year ago this was 60) | (>59 mL/min/1.73m <sup>2</sup> ) |
| Urine ACR 2.0                      | (<3.5 mg/mmol)                   |
| Cholesterol 5.4                    | (3.9-5.5 mmol/L)                 |
| LDL 3.3                            | (0.0-4.0 mmol/L)                 |
| HDL 1.81                           | (1.1-1.9 mmol/L)                 |
| Fasting glucose 5.0                | (3.6-6.0 mmol/L)                 |

Brad is a 45 year old Aboriginal man who lives in regional Australia with his wife and 2 children. He is an ex-smoker (he gave up 5 years ago). He is not diabetic, but has a strong family history of diabetes.

He has an annual check- up with his GP. His BMI is 27 and BP 140/90 (consistent with previous readings).

His most recent results show:

| Results                            | (Reference Range)                |
|------------------------------------|----------------------------------|
| eGFR 65 (one year ago this was 70) | (>59 mL/min/1.73m <sup>2</sup> ) |
| Urine ACR 2.4                      | (<2.5 mg/mmol)                   |
| Cholesterol 5.4                    | (3.9-5.5 mmol/L)                 |
| LDL 3.3                            | (0.0-4.0 mmol/L)                 |
| HDL 1.81                           | (1.1-1.9 mmol/L)                 |
| Fasting glucose 5.0                | (3.6-6.0 mmol/L)                 |
